# Supplementary material
Source: Springer Nature journal article supplement (https://www.springermedizin.de/resource/supplementary/12992_2010_81_MOESM2_ESM.pdf/9616464)

# First-line Regimens in WHO Guidelines

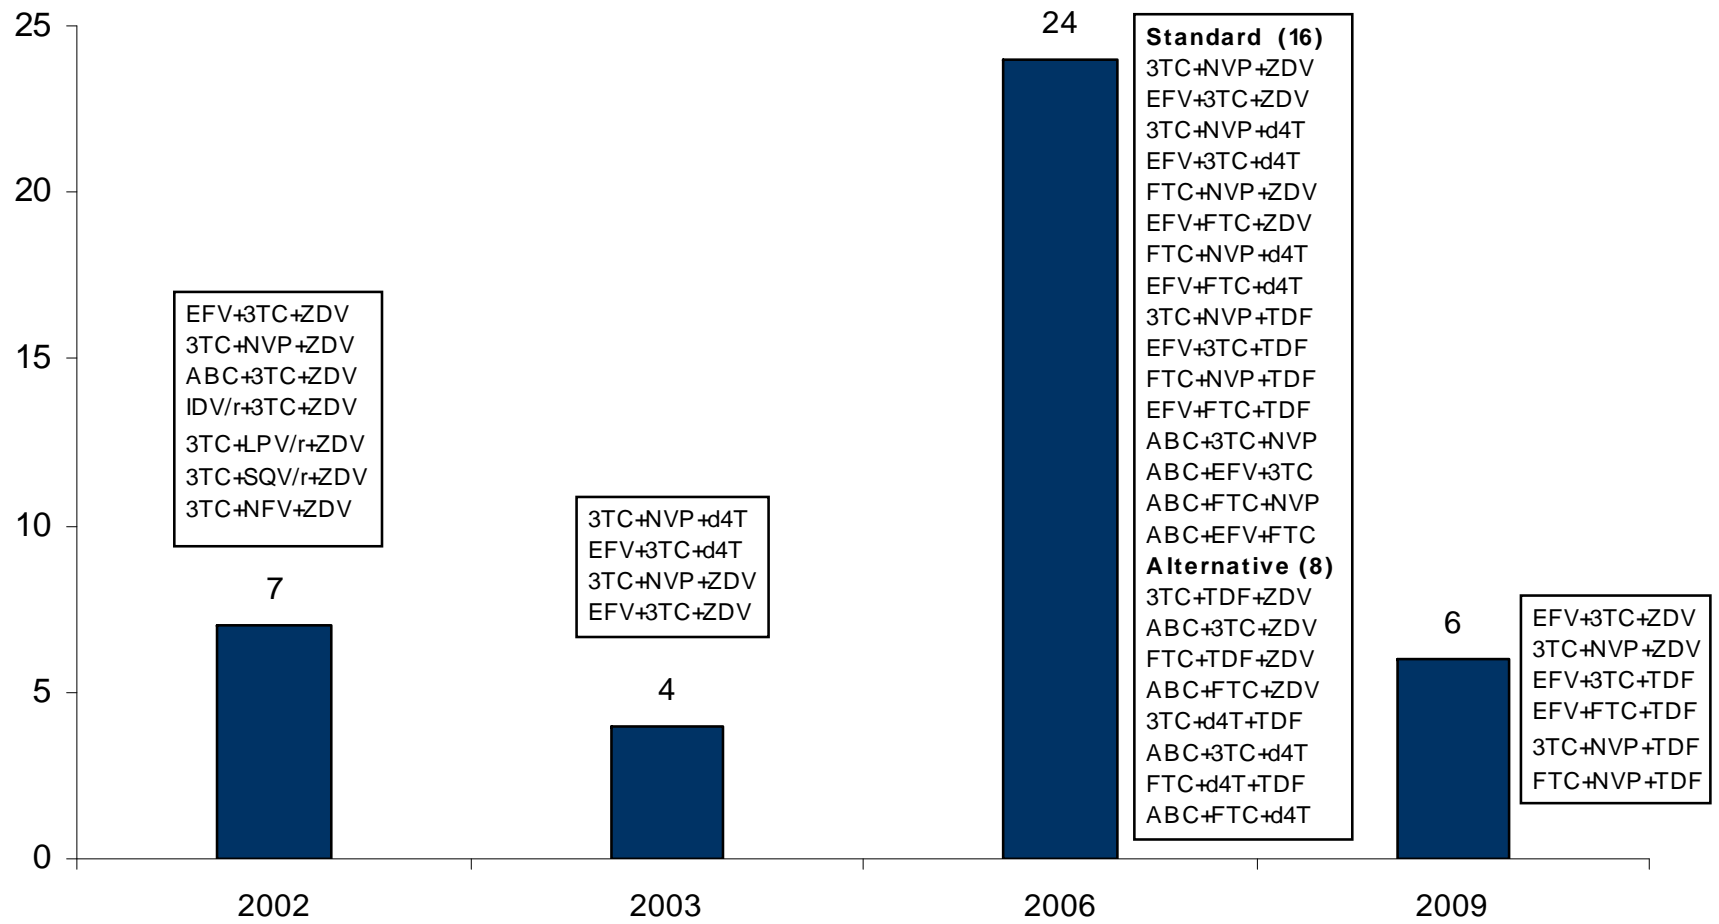

Supplement: MOESM2 [file 9616464]
